# Supplementary material for: Fu Loose Tea Administration Ameliorates Obesity in High-Fat Diet-Fed C57BL/6J Mice: A Comparison with Fu Brick Tea and Orlistat
Source: MDPI journal article supplement (doi:10.3390/foods13020206), 2024-01-09
Supplement: s1 [file s1]

**Table S1.** Primer sequences and the PCR product amplified fragments used in RT-qPCR

| Genes                  | Accession no.  | Sequences (5'→3')                                  |
|------------------------|----------------|----------------------------------------------------|
| SREBP-1c               | NM_001313979.1 | CCATCGACTACATCCGCTTCTT<br>CAGGTCCTTCAGTGATTTGCTTT  |
| ACC                    | NM_133360.2    | TTTGTTTGGTCGTGACTGCTCTG<br>AGGATGTTCAACCTGTAGCCGAG |
| FAS                    | NM_001146708.1 | TGTCCTGCCTCTGGTGCTTG<br>GCAAAATGGGCCTCCTTGATAT     |
| PPAR $\alpha$          | NM_011144.6    | CACTACGGAGTTCACGCATGT<br>GTGACATCCCGACAGACAGGC     |
| AMPK                   | NM_001013367.3 | AACCTGAGAACGTCCTGCTTGAT<br>CTTCCTGAAATGACTTCTGGTGC |
| JNK                    | NM_001310452.1 | GCCATTTCAGAATCAGACCCAT<br>CCCGATGAATAATTCCAGCAGA   |
| PI3K                   | NM_001024955.2 | AAACTCCGAGACACTGCTGATG<br>GCTGGTATTTGGACACTGGGTA   |
| I $\kappa$ B- $\alpha$ | NM_010907.2    | CACTTGGTGACTTTGGGTGCT<br>GCTGTATCCGGGTACTTGGG      |
| AKT                    | NM_009652.3    | CTTCCTCCTCAAGAACGATGGC<br>TGTCTTCATCAGCTGGCATTGT   |
| GAPDH                  | NM_008084.2    | CCTCGTCCCGTAGACAAAATG<br>TGAGGTCAATGAAGGGGTCGT     |

SREBP-1c, sterol regulatory element binding protein-1c; ACC, acetyl-CoA carboxylase, FAS, fatty acid synthase; PPAR $\alpha$ , peroxisome proliferator-activated receptor-alpha; AMPK, AMP-activated protein kinase; JNK, c-Jun-N-terminal kinase; PI3K, phosphatidylinositol-3-hydroxy kinase; I $\kappa$ B- $\alpha$ , IkappaB-alpha; AKT, protein kinase B; GAPDH, Glyceraldehyde-3-phosphate dehydrogenase.
